# Supplementary material for: Formation of size-tunable CdS rhombic dodecahedra
Source: Royal Society of Chemistry journal article supplement (doi:10.1039/d1tc01310f), 2021-01-01
Supplement: d1tc01310f1.pdf [file d1tc01310f1.pdf]

Electronic Supplementary Information

**Formation of size-tunable CdS rhombic dodecahedra**

Chien-Hsuan Hsiao,<sup>a</sup> Chun-Wei Chen,<sup>a</sup> Hsiang-Sheng Chen,<sup>b</sup> Pei-Lun Hsieh,<sup>c</sup> Yi-An Chen<sup>d</sup> and Michael H. Huang<sup>\*ae</sup>

<sup>a</sup>*Department of Chemistry, National Tsing Hua University, Hsinchu 30013, Taiwan.*

*E-mail: hyhuang@mx.nthu.edu.tw*

<sup>b</sup>*School of Chemistry, University of New South Wales, Sydney, NSW 2052, Australia*

<sup>c</sup>*Department of Materials Science and Engineering, National Tsing Hua University, Hsinchu 30013, Taiwan*

<sup>d</sup>*Department of Materials Science and Engineering, National Yang Ming Chiao Tung University, Hsinchu 30010, Taiwan*

<sup>e</sup>*Frontier Research Center on Fundamental and Applied Sciences of Matters, National Tsing Hua University, Hsinchu 30013, Taiwan*

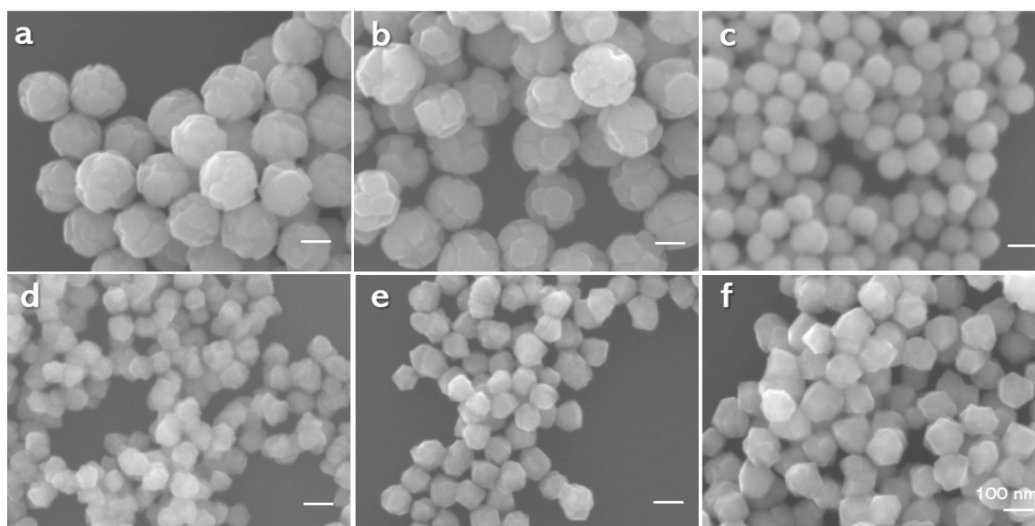

**Fig. S1** SEM images of the CdS particles produced by adding (a) 0.1, (b) 0.2, (c) 0.4, (d) 0.6, (e) 0.8 and (f) 1.0 M of HNO<sub>3</sub> solution. All scale bars are equal to 100 nm.

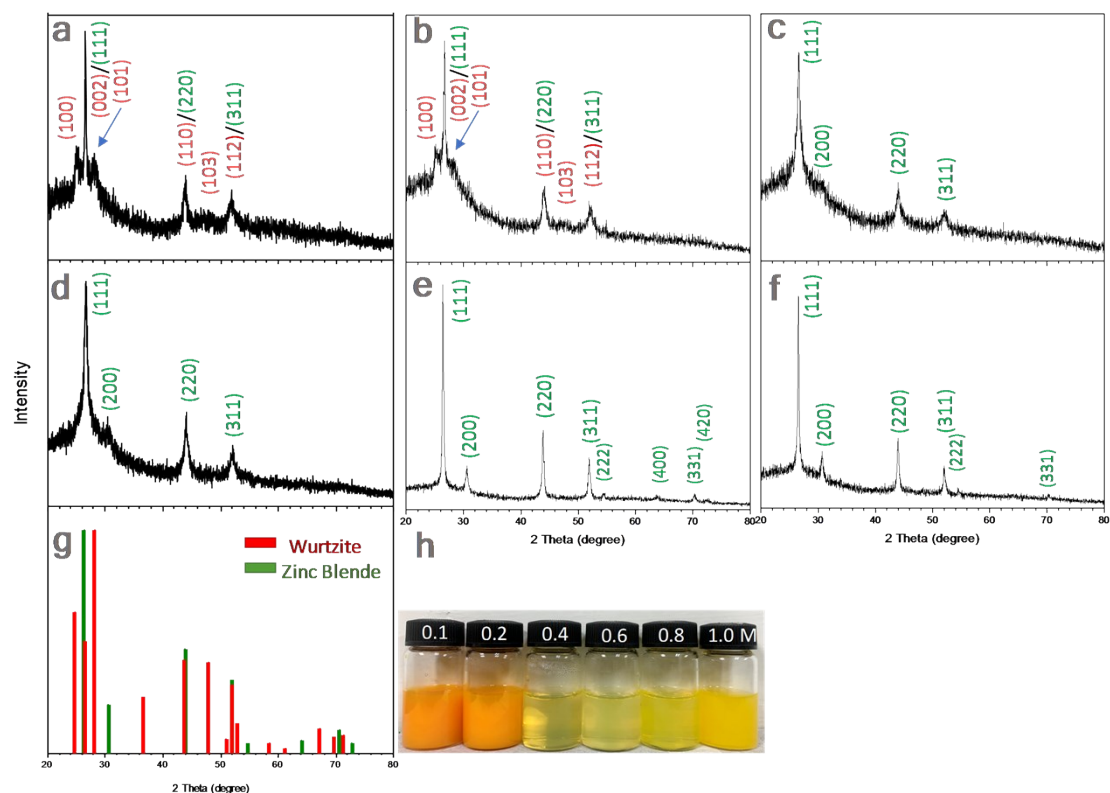

**Fig. S2** (a–f) XRD patterns of the CdS particles synthesized by adding (a) 0.1, (b) 0.2, (c) 0.4, (d) 0.6, (e) 0.8 and (f) 1.0 M HNO<sub>3</sub> solution. (g) Standard XRD patterns of wurtzite and zinc blende CdS. (f) Photograph of the CdS particle solutions.

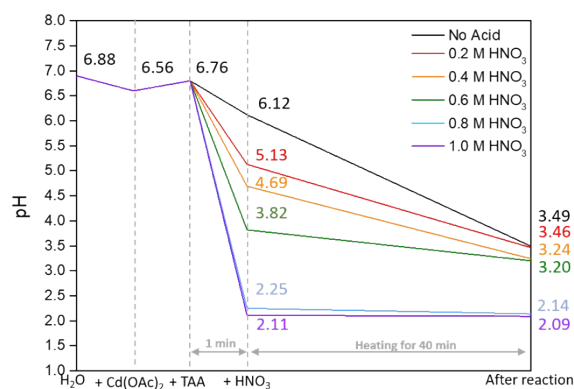

**Fig. S3** Solution pH changes upon adding each reagent in the synthesis of CdS particles.

**Table S1** Reagent amounts used to grow size-tunable CdS rhombic dodecahedra.

| Size (nm) | Water bath temperature | Water   | 0.1 M Cd(CH <sub>3</sub> COO) <sub>2</sub> | 0.05 M TAA | 1.0 M HNO <sub>3</sub> | Oven temperature | Time   |
|-----------|------------------------|---------|--------------------------------------------|------------|------------------------|------------------|--------|
| 64 nm     | 29 °C                  | 8.44 mL | 400 μL                                     | 1000 μL    | 160 μL                 | 110 °C           | 40 min |
| 83 nm     | 27 °C                  |         |                                            |            |                        |                  |        |
| 99 nm     | 25 °C                  |         |                                            |            |                        |                  |        |
| 110 nm    | 24 °C                  |         |                                            |            |                        |                  |        |
| 150 nm    | 23 °C                  |         |                                            |            |                        |                  |        |

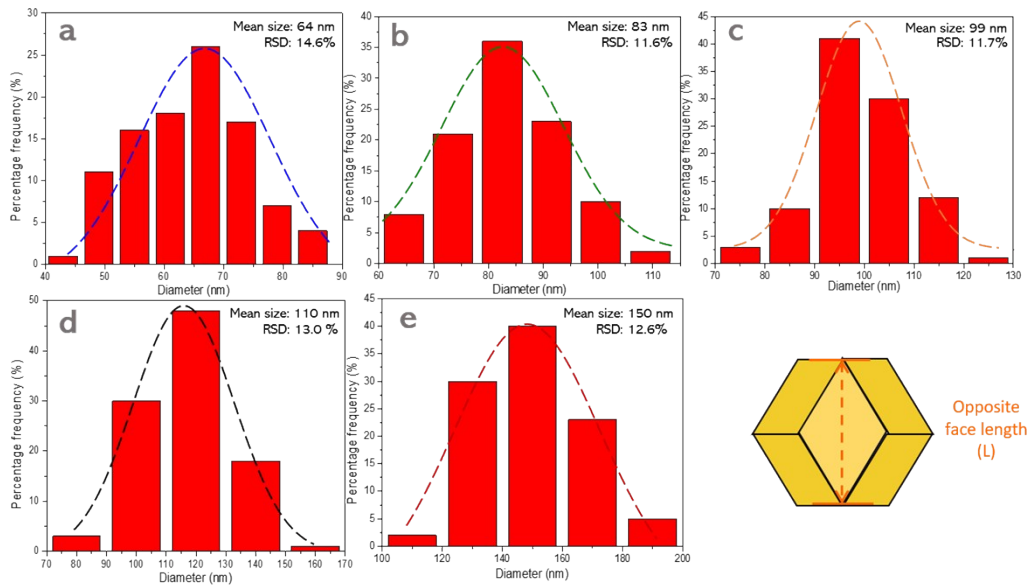

**Fig. S4** (a–e) Size distribution histograms of the synthesized CdS rhombic dodecahedra with tunable sizes.

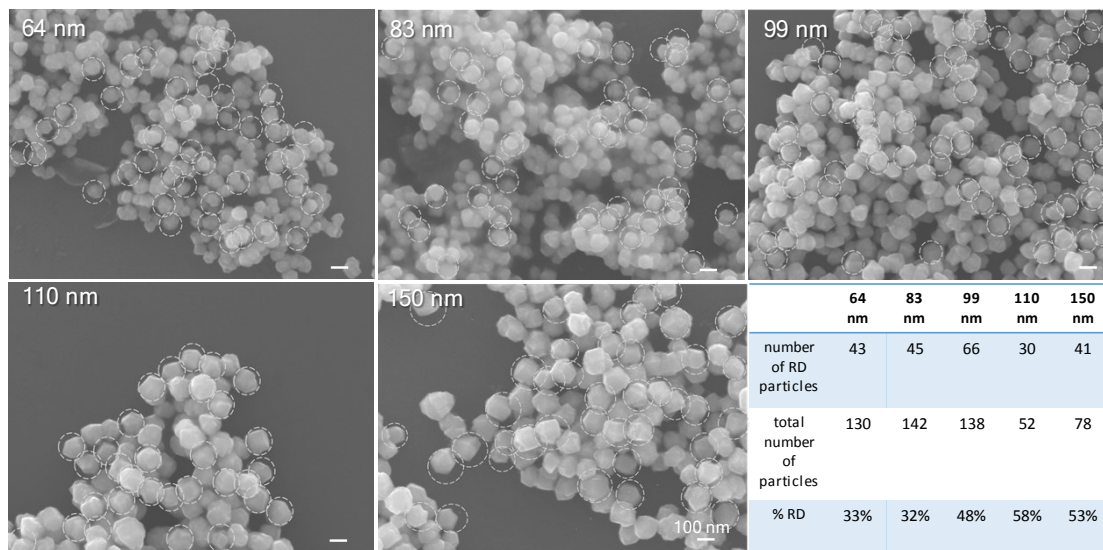

**Fig. S5** SEM images of the size-tunable rhombic dodecahedral CdS samples with clearly RDs marked in circles. The estimated RD particle percentages determined from these SEM images are provided.

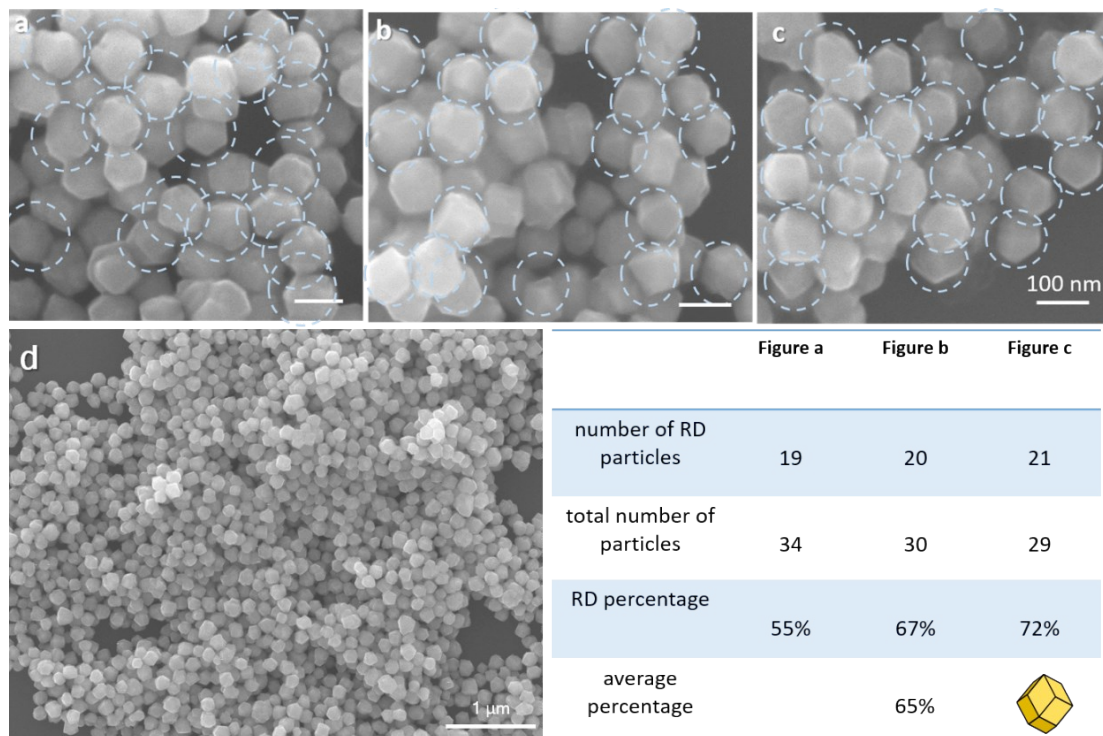

**Fig. S6** (a–d) Additional SEM images of the 110 nm rhombic dodecahedral CdS sample showing a higher RD particle yield.

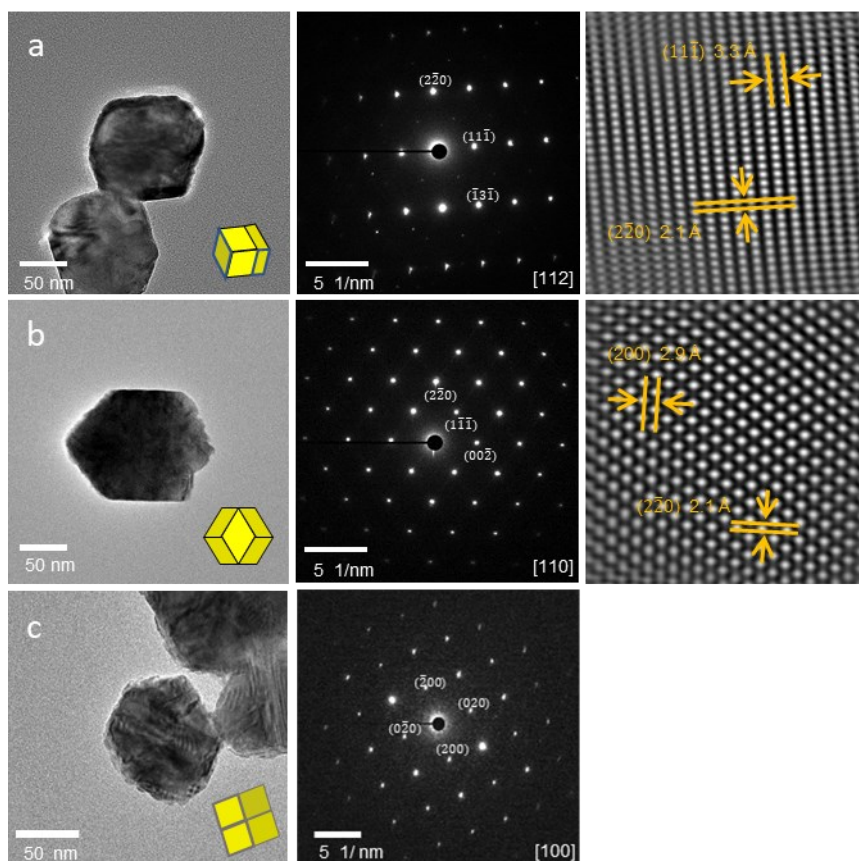

**Fig. S7** TEM and HR-TEM images, SAED patterns, and particle models of CdS rhombic dodecahedra viewed along the (a) [112], (b) [110] and (c) [100] directions. In panel (c), the particle does not exactly match with a RD shape, but its SAED pattern agrees with the [100] particle orientation.

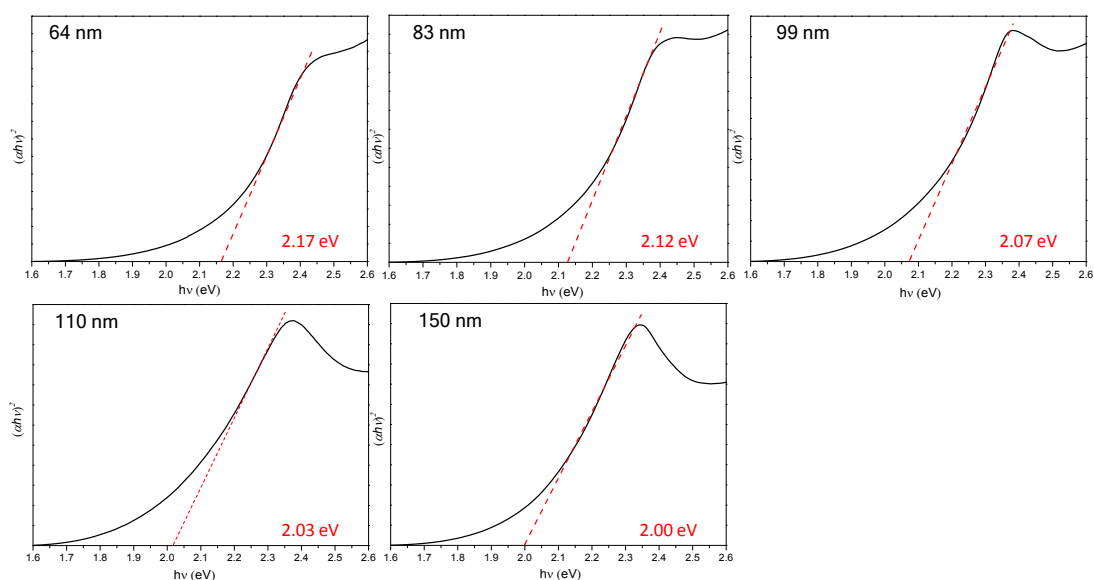

**Fig. S8** Tauc plots converted from UV-vis spectra for the synthesized size-tunable CdS rhombic dodecahedra.

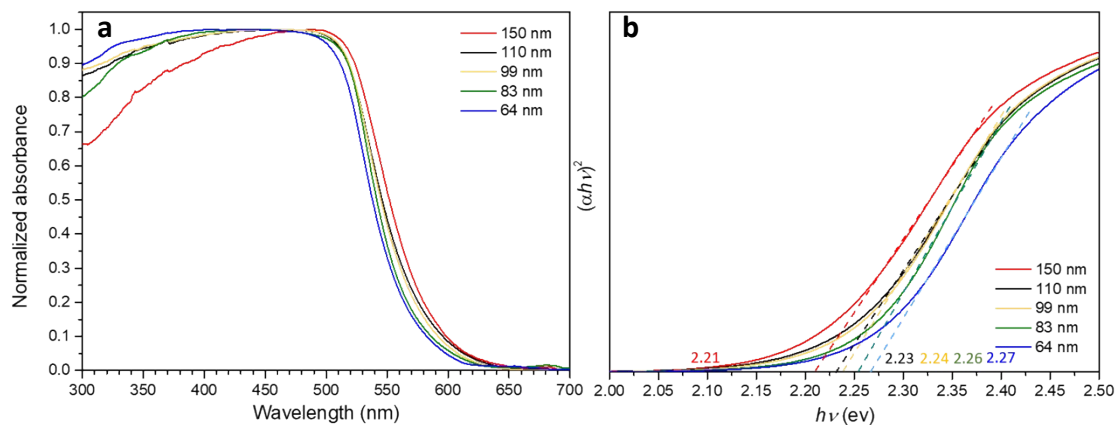

**Fig. S9** (a) Diffuse reflectance spectra of the synthesized size-tunable CdS rhombic dodecahedra and (b) the converted Tauc plots for band gap determination.

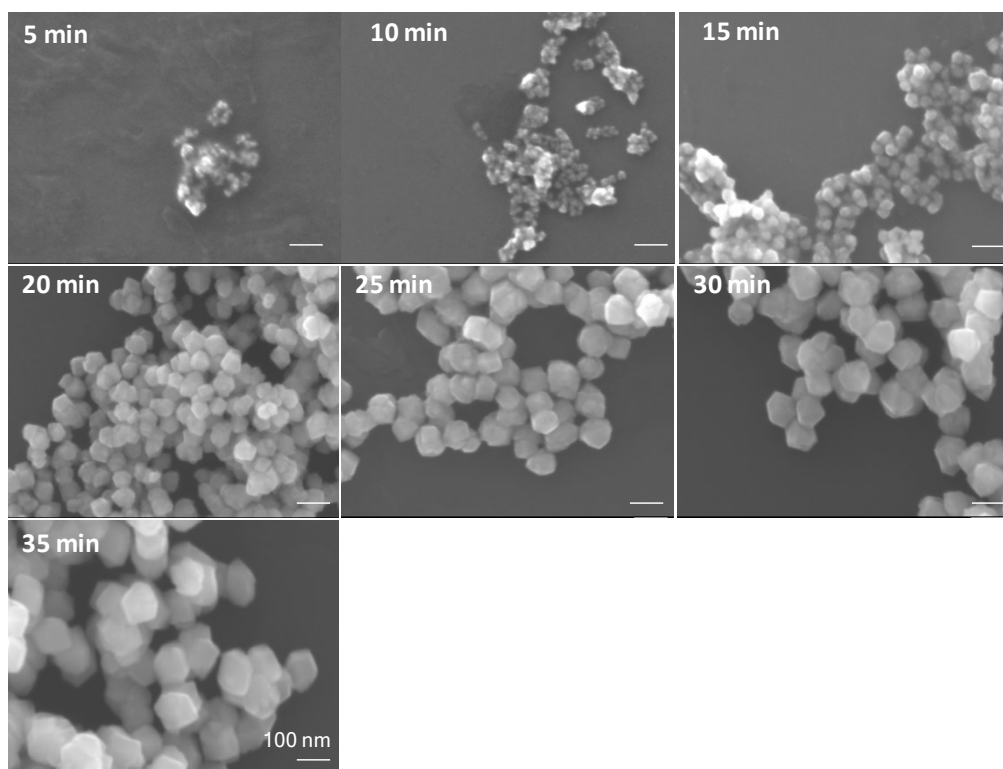

**Fig. S10** SEM images showing the evolution in the formation of CdS rhombic dodecahedra. Scale bars are all equal to 100 nm.

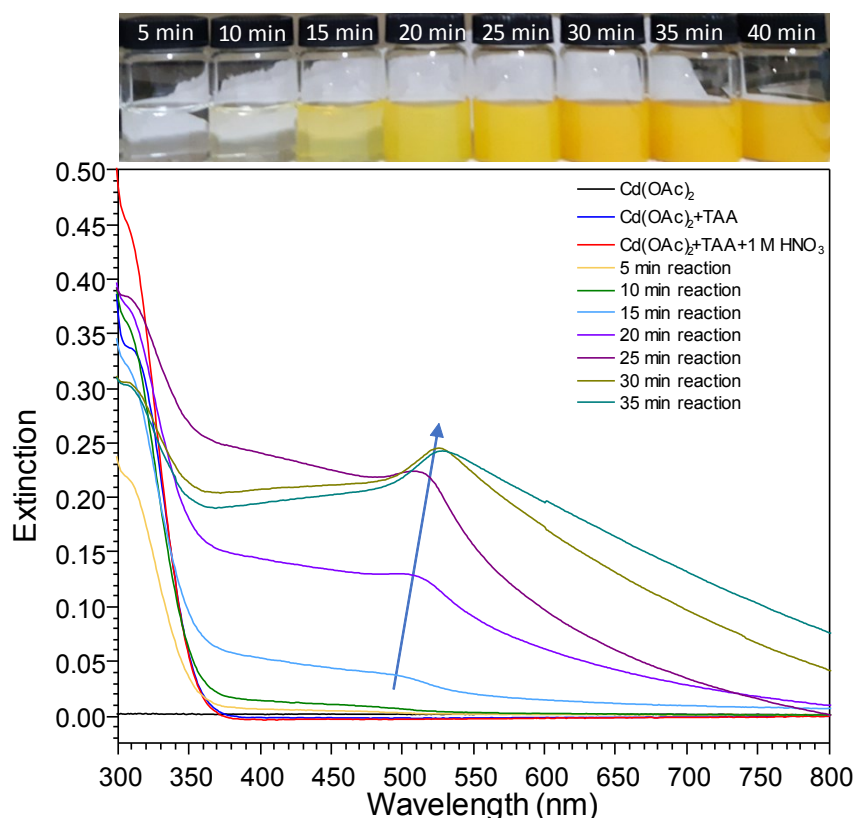

**Fig. S11** Photograph and UV-vis spectra taken in the growth of 110 nm CdS rhombic dodecahedra. Reaction time is labeled for each sample.

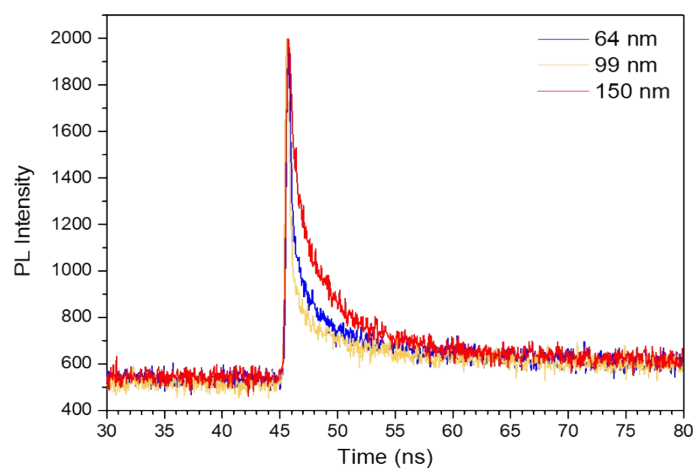

|        | $A_1$ | $\tau_1(\text{ns})$ | $A_2$ | $\tau_2(\text{ns})$ | $\tau_{av}(\text{ns})$ | $\chi^2$ |
|--------|-------|---------------------|-------|---------------------|------------------------|----------|
| 150 nm | 938.5 | 5.681               | 1872  | 0.2885              | 5.185                  | 1.2437   |
| 99 nm  | 602.8 | 3.875               | 14716 | 0.06079             | 2.819                  | 1.1411   |
| 64 nm  | 723.3 | 3.996               | 8325  | 0.08112             | 3.255                  | 1.1016   |

**Fig. S12** Time-resolved photoluminescence of different-sized CdS rhombic dodecahedra. Emission lifetimes can be derived from the TRPL data. The excitation wavelength is 375 nm. The recorded emission wavelengths are 534, 539, and 552 nm for 64, 99, and 150 nm CdS rhombic dodecahedra, respectively.

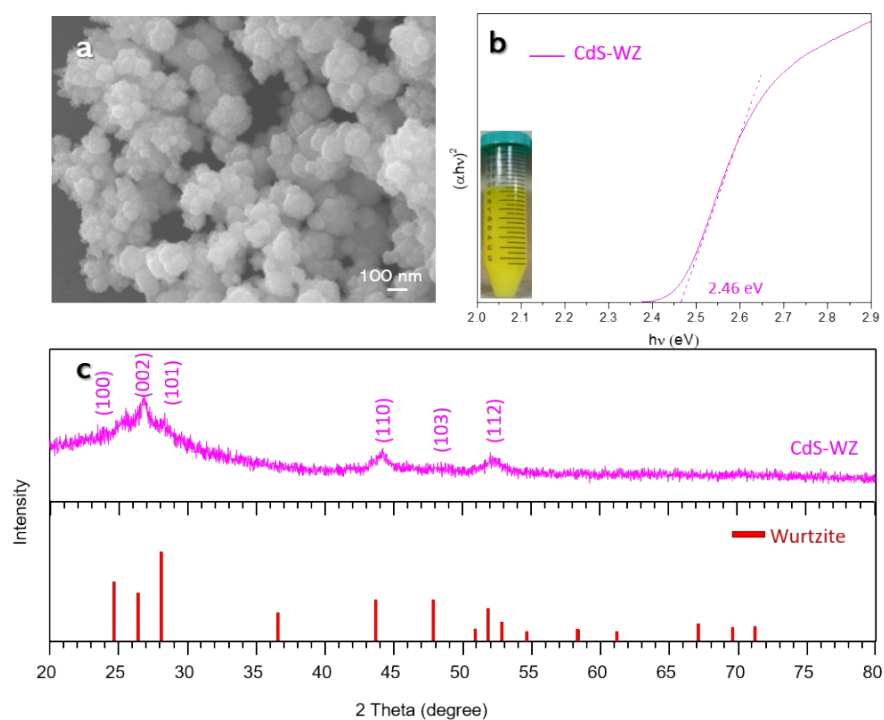

**Fig. S13** (a) SEM image of the prepared CdS particles having a wurtzite crystal structure. (b) Tauc plot of CdS particles for band gap determination. A photograph of the yellow particle solution is provided. (c) XRD pattern of the CdS sample.
